# Supplementary material
Source: bioRxiv or medRxiv preprint supplement (https://medrxiv.org/highwire/filestream/94981/field_highwire_adjunct_files/2/2020.08.29.20126201-3.pdf)
Supplement: Supplementary file [file 2020.08.29.20126201-3.pdf]

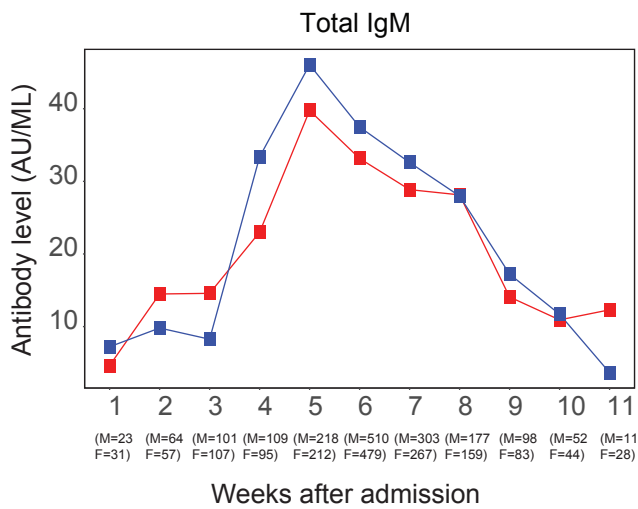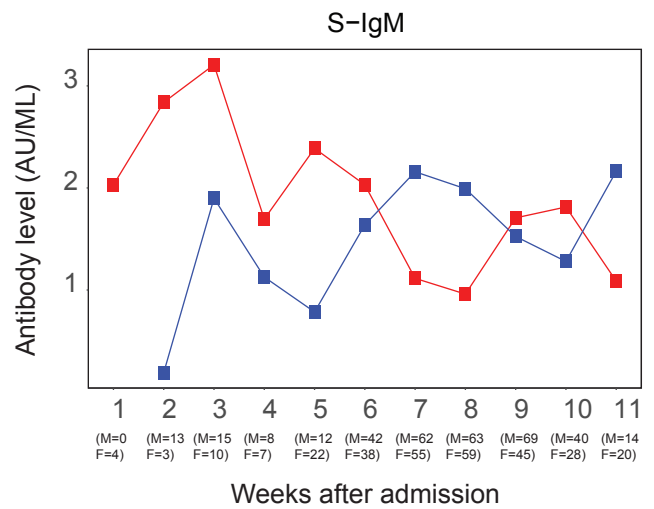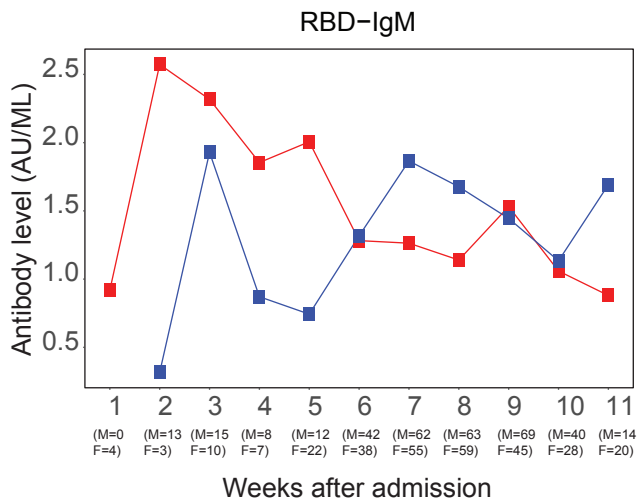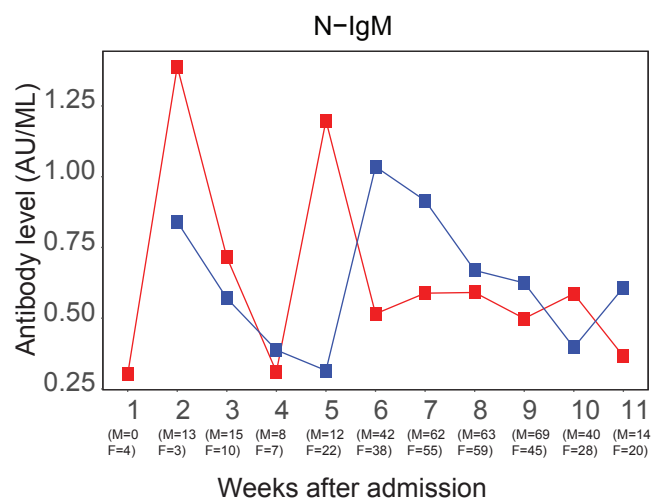

Sex ■ Female ■ Male

**Supplementary Figure S2. The dynamic changes of IgM levels.** The x-axis displays the weeks after admission. F indicates the number of tests of females, and M indicates the number of tests of males. The y-axis displays the level of IgM level. Red line based on median is used to profile the variation tendency of the females, and blue line based on median is used to profile the variation tendency of the males.
